# Supplementary material for: Wave-driven butterfly distribution of Van Allen belt relativistic electrons
Source: PubMed Central journal article supplement (PMC4600758; doi:10.1038/ncomms9590), 2015-10-05
Supplement: ncomms9590-s1.pdf [file ncomms9590-s1.pdf]

## Supplementary Figures

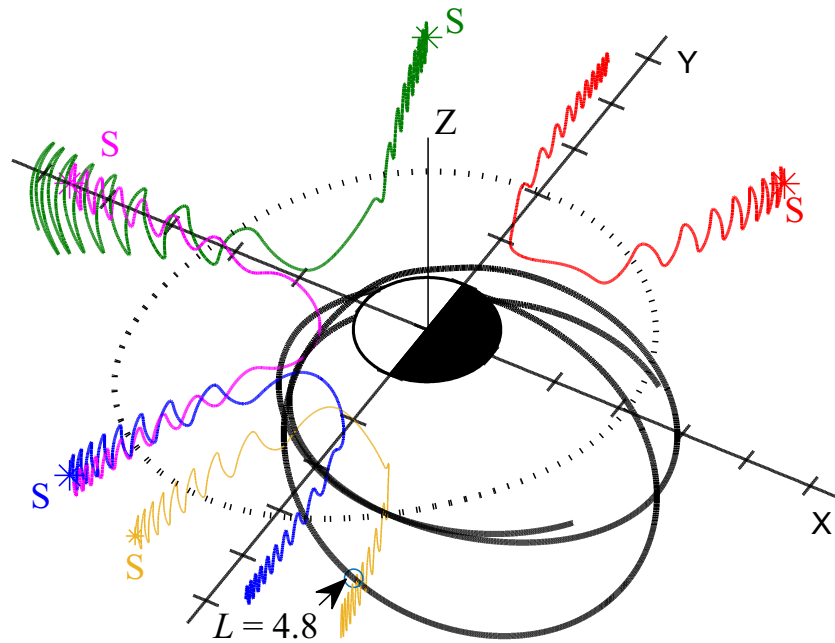

**Supplementary Figure 1: Ray-tracing of MS waves.** Ray paths representing MS waves are initiated at the geomagnetic equator  $L = 5.6$  for different MLT regions (asterisks), with the initial azimuthal angles ( $\eta_0$ ) as shown in Supplementary Table 1. The black solid line indicates the trajectory of Van Allen Probe A in this event. The dotted line denotes the plasmapause. MS waves can propagate either into or outside the plasmasphere through the plasmapause, covering a broad region of  $L = 2 - 5.6$ , particularly the observed butterfly distribution location  $L = 4.8$  and MLT=19.

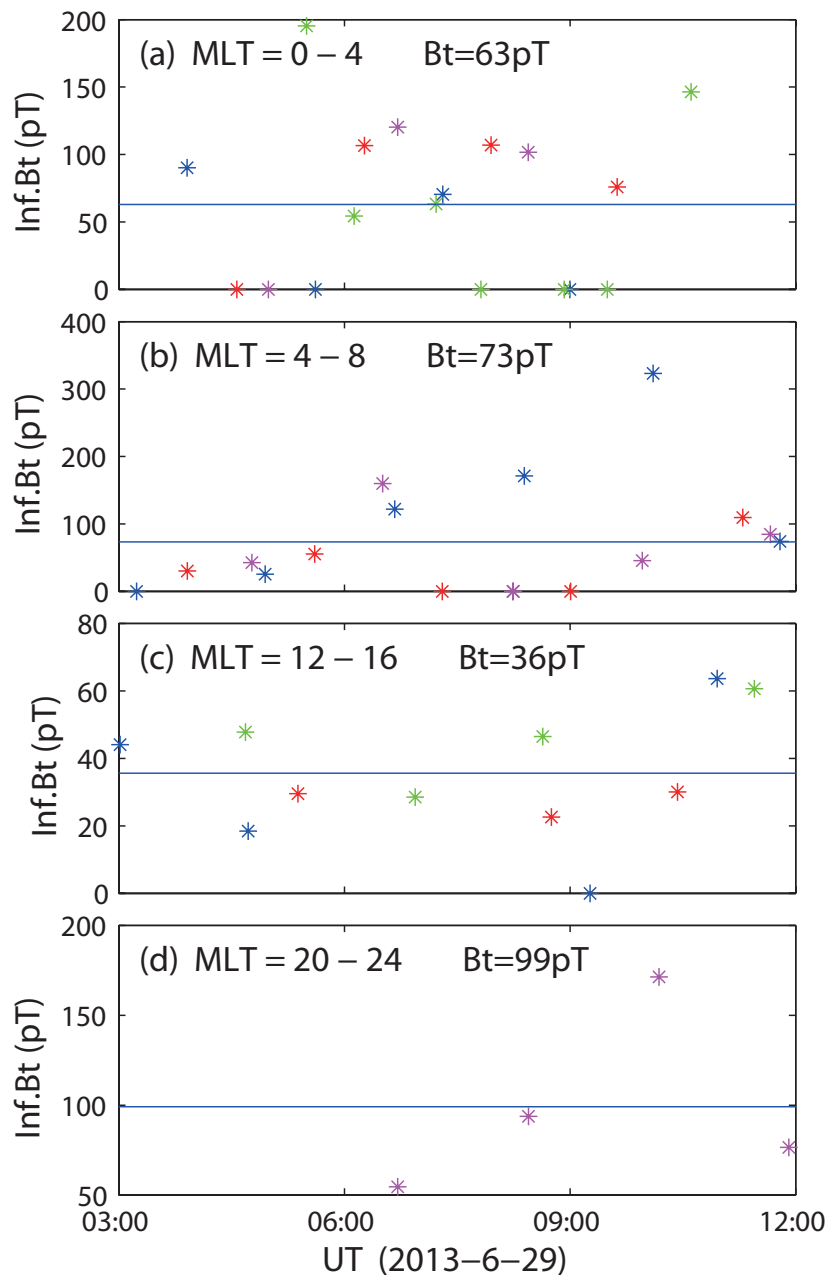

**Supplementary Figure 2: Modeling the global distribution of chorus.** For the spatial region of  $L = 4.8$  in various MLT sectors during 0300 – 1200 UT on 29 June 2013, the ratios  $RR$ , and the inferred chorus wave intensity based on the POES 30-100 keV channel data. Note: the inferred  $B_t = 99$  pT in 20-24 MLT is comparable to the observed  $B_t = 81$  pT in Table 1.

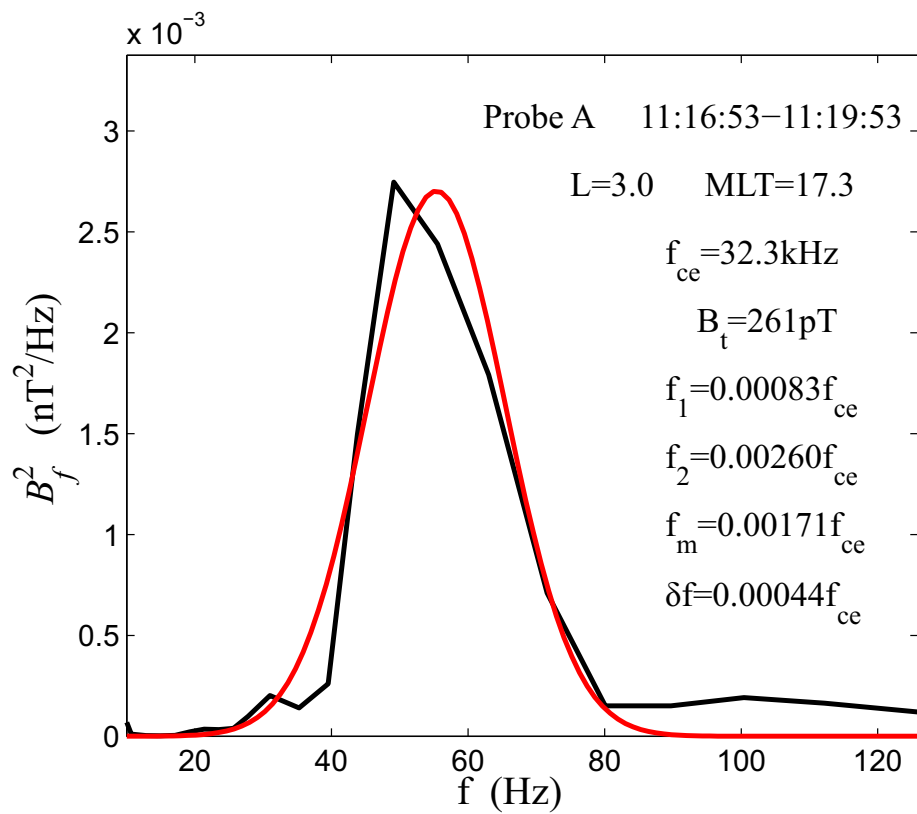

**Supplementary Figure 3: Gaussian fitting curves of MS waves.** The modeled Gaussian fit (red) to the observed MS wave spectra (black) over a 3-minute period 11:16:53-11:19:53 is shown, together with the fitted wave amplitude  $B_t$ , the peak wave frequency  $f_m$ , the bandwidth  $\delta f$ , the lower and upper bands  $f_1$  and  $f_2$ .

**Supplementary Table 1****Supplementary Table 1:** Parameters for ray tracing of MS wave

|          |      |      |      |      |      |
|----------|------|------|------|------|------|
| MLT      | 4    | 8    | 12   | 16   | 17   |
| $\eta_0$ | 196° | 162° | 179° | 196° | 188° |

## Supplementary Notes

### Supplementary Note 1

Here, we use Earth centered Cartesian and a local Cartesian coordinate systems for the ray-tracing calculation. In Earth centered Cartesian coordinate system ( $OXYZ$ ), the  $Z$  axis points north along the geomagnetic axis; and the  $X$  and  $Y$  axes stay in the geomagnetic axis equatorial plane. In local Cartesian system ( $pxyz$ ), the  $z$  axis points along the direction of the ambient magnetic field, the  $x$  axis is orthogonal to the  $z$  axis and stays in the meridian plane pointing away from the Earth at the equator, and the  $y$  axis completes the right-handed set. The wave vector  $\mathbf{k}$  makes an angle  $\theta$  with the  $z$  axis and the projection of  $\mathbf{k}$  onto the  $xy$  plane makes an angle  $\eta$  with the  $x$  axis, viz.,  $\mathbf{k} = k \cos \theta \hat{\mathbf{z}} + k \sin \theta \cos \eta \hat{\mathbf{x}} + k \sin \theta \sin \eta \hat{\mathbf{y}}$ .  $\eta = 0^\circ, 90^\circ, 180^\circ$  and  $270^\circ$  correspond to the perpendicular component  $\mathbf{k}_\perp$  pointing away from Earth, toward later MLT (eastward), toward Earth, and toward earlier MLT (westward), respectively.

### Supplementary Note 2

The basic equation for linking the ratio ( $R$ ) of electron count rates (C.R.) measured by the  $0^\circ$  and  $90^\circ$  telescopes to chorus wave amplitude can be written

$$R = \frac{C.R.|_{0^\circ}}{C.R.|_{90^\circ}} = \frac{\int_{E_1}^{E_2} \int_0^{2\pi} \int_0^\beta J_{in}(\alpha, E) A \sin \eta d\eta d\psi dE}{\int_{E_1}^{E_2} \int_0^{2\pi} \int_0^\beta J_{out}(\alpha, E) A \sin \eta d\eta d\psi dE} \quad (1)$$

$$= \frac{\int_{E_1}^{E_2} \int_0^{2\pi} \int_0^\beta \frac{J(E)}{D_{\alpha\alpha}|\alpha_0} \frac{I_0(\frac{\alpha_{in}}{\alpha_0} z_0)}{z_0 I_1(z_0)} \sin \eta d\eta d\psi dE}{\int_{E_1}^{E_2} \int_0^{2\pi} \int_0^\beta \frac{J(E)}{D_{\alpha\alpha}|\alpha_0} \cos \alpha_{out} \left[ \frac{I_0(z_0)}{z_0 I_1(z_0)} + \ln \frac{\sin \alpha_{out}}{\sin \alpha_0} \right] \sin \eta d\eta d\psi dE} \quad (2)$$

where  $\beta$  and  $A$  are the half-angle of the detector acceptance and the sensor area,  $E_1$  and  $E_2$  are lower and upper electron energy ( $E$ ) for integration,  $\alpha$  is the local electron pitch angle given by the cosine law for spherical triangles  $\cos \alpha = \cos \theta \cos \eta + \sin \theta \sin \eta \cos \psi$ ,  $\alpha_{in}$  and  $\alpha_{out}$  are the equatorial pitch angles corresponding to the local pitch angle  $\alpha$  for the  $0^\circ$  and  $90^\circ$  telescopes,  $J_{in}$  and  $J_{out}$  are electron fluxes measured by the  $0^\circ$  and  $90^\circ$  telescopes,  $D_{\alpha\alpha}|\alpha_0$  is the bounce-averaged electron pitch angle diffusion coefficient at the equatorial loss cone  $\alpha_0$  that is mainly controlled by the amplitude of chorus waves, and  $I_0$  and  $I_1$  are modified Bessel functions.  $z_0 = \frac{\alpha_0}{\tau_b D_{\alpha\alpha}|\alpha_0 \cos \alpha_0}$ , where  $\tau_b$  is a quarter of the electron bounce period. The electron energy spectrum ( $J(E)$ ) is assumed to follow a kappa-type function<sup>1,2</sup> with  $\kappa = 5$  and  $\theta_\kappa^2 = 0.05$ , where  $\kappa$  and  $\theta_\kappa^2$  are the spectral index and effective thermal energy scaled by the electron rest mass energy  $m_e c^2$  ( $\sim 0.5$  MeV). More details for inferring the chorus wave amplitudes are shown in the previous work.<sup>3</sup>

## Supplementary References

1. Xiao, F., Shen, C., Wang, Y., Zheng, H. & Wang, S. Energetic electron distributions fitted with a relativistic kappa-type function at geosynchronous orbit. *J. Geophys. Res.* 113, A05203 (2008).
2. Vasyliunas, V. M. A survey of low-energy electrons in the evening sector of the magnetosphere with ogo 1 and ogo 3, *J. Geophys. Res.*, 73(9), 2839-2884 (1968).
3. Li, W. et al. Constructing the global distribution of chorus wave intensity using measurements of electrons by the poes satellites and waves by the van allen probes, *Geophys. Res. Lett.*, 40, 4526-4532 (2013).
